# Supplementary material for: The Influence of Soil Fertilization on the Distribution and Diversity of Phosphorus Cycling Genes and Microbes Community of Maize Rhizosphere Using Shotgun Metagenomics
Source: MDPI journal article supplement (doi:10.3390/genes12071022), 2021-06-30
Supplement: s1 [file s1]

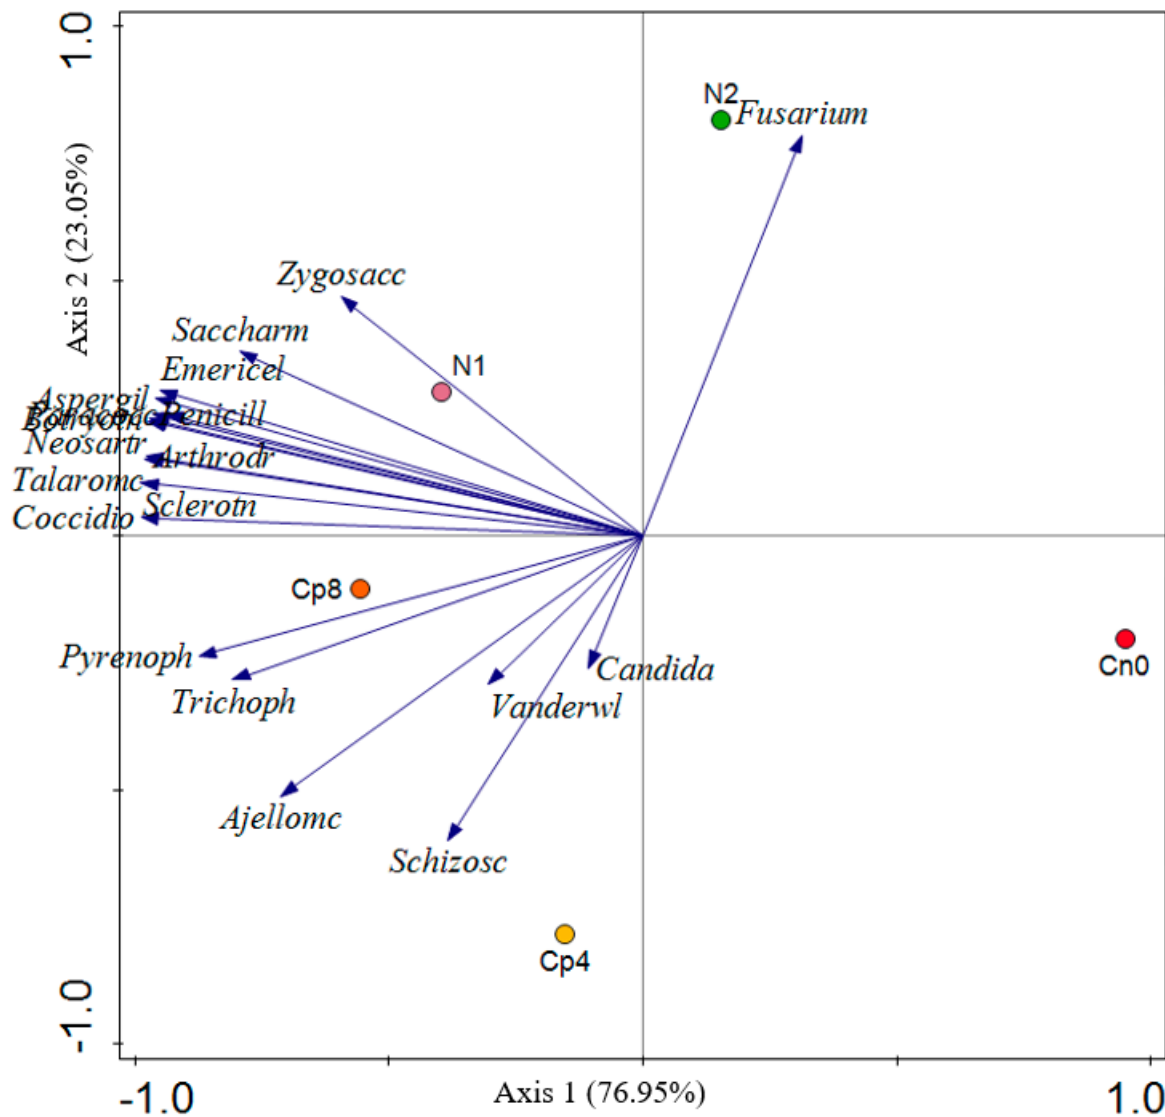

**Figure S1.** PCA for the fungal genus dominant at the maize rhizosphere under fertilization and control.

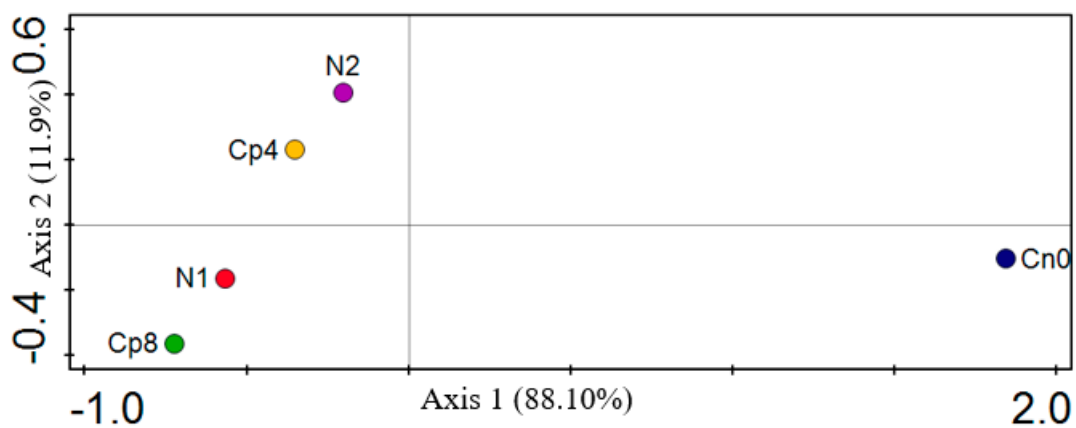

**Figure S2.** PCoA analysis for the fungal genus dominant at the maize rhizosphere under control and soil fertilization.

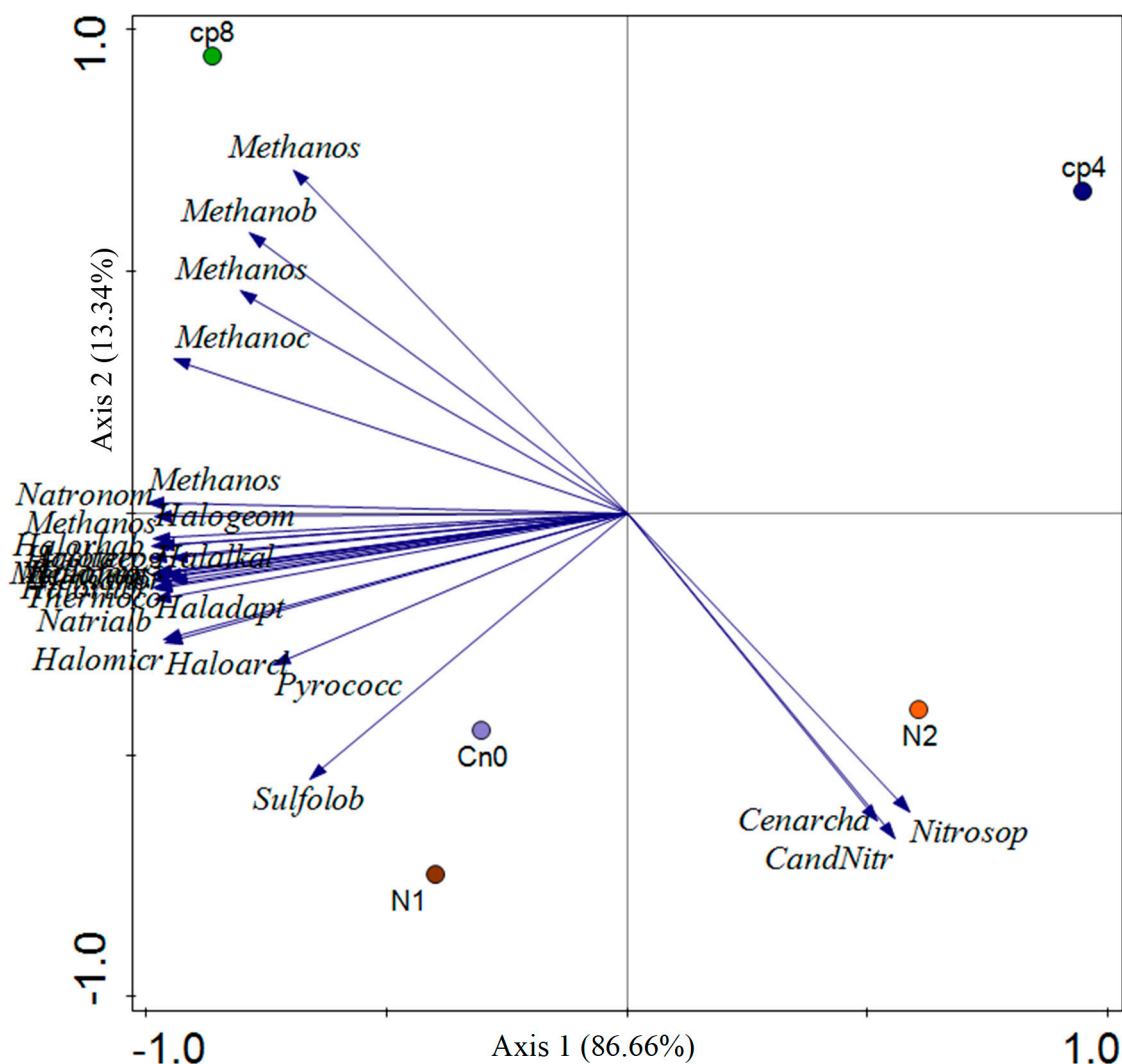

**Figure S3.** Principal component analysis of archaeal genus present at the maize rhizosphere under control, organic and inorganic fertilization.

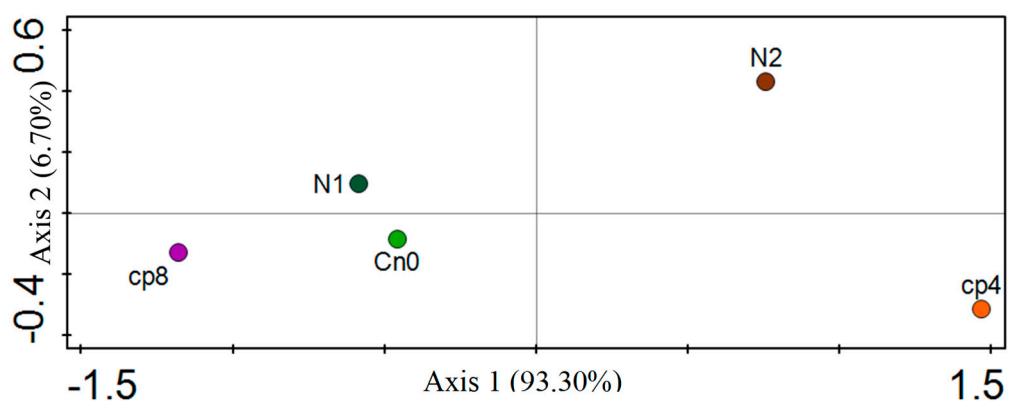

**Figure S4.** Principal coordinate analysis of the archaeal genus abundant in the maize rhizosphere under fertilization and control conditions.

**Table S1.** Quantity of microbial phosphorus cycling genes present in the rhizosphere soil samples.

| function    | Cp8  | Cp4 | N2  | N1   | Cn0  |
|-------------|------|-----|-----|------|------|
| <i>phoA</i> | 704  | 173 | 575 | 389  | 347  |
| <i>phoB</i> | 1941 | 29  | 13  | 1078 | 920  |
| <i>phoP</i> | 779  | 144 | 183 | 565  | 513  |
| <i>ugpQ</i> | 2285 | 367 | 968 | 1578 | 1324 |
| <i>phoD</i> | 2002 | 79  | 69  | 1512 | 1455 |
| <i>pstC</i> | 2759 | 230 | 597 | 1596 | 1332 |
| <i>pstA</i> | 2501 | 151 | 470 | 1392 | 1259 |
| <i>pstS</i> | 2854 | 186 | 547 | 1777 | 1425 |
| <i>pstB</i> | 3132 | 268 | 676 | 2108 | 1801 |
| <i>appA</i> | 3    | 1   | 3   | 2    | 2    |
| <i>phnE</i> | 679  | 54  | 238 | 314  | 300  |
| <i>phnC</i> | 620  | 49  | 104 | 270  | 278  |
| <i>phnD</i> | 597  | 39  | 111 | 278  | 253  |
| <i>phnA</i> | 231  | 76  | 130 | 55   | 59   |
| <i>phnW</i> | 200  | 103 | 241 | 170  | 138  |
| <i>phnK</i> | 93   | 2   | 1   | 63   | 58   |
| <i>phnL</i> | 79   | 1   | 1   | 62   | 54   |
| <i>phnT</i> | 32   | 1   | 1   | 34   | 37   |
| <i>phnX</i> | 22   | 40  | 128 | 16   | 23   |
| <i>PPXI</i> | 1472 | 155 | 279 | 1134 | 890  |
| <i>ppk</i>  | 5471 | 391 | 696 | 3639 | 3153 |
| <i>gcd</i>  | 3492 | 203 | 249 | 2016 | 2004 |
| <i>ugpA</i> | 639  | 109 | 273 | 405  | 414  |
| <i>ugpB</i> | 761  | 114 | 297 | 552  | 515  |
| <i>ugpC</i> | 875  | 132 | 349 | 646  | 532  |
| <i>ugpE</i> | 561  | 64  | 144 | 342  | 344  |
| <i>tpiA</i> | 2683 | 174 | 234 | 1686 | 1318 |
